# Supplementary material for: Sustainable production of a polysaccharide-based glycoprotein by simultaneous conversion of glucose and glycerol in engineered Escherichia coli
Source: Royal Society of Chemistry journal article supplement (doi:10.1039/d3gc01279d), 2023-01-01
Supplement: d3gc01279d1.pdf [file d3gc01279d1.pdf]

## Supplementary materials for

### Sustainable production of polysaccharide-based glycoprotein by simultaneous conversion of glucose and glycerol in engineered *Escherichia coli*

Yuhui Wang<sup>a,b</sup>, Xiaohan Wang<sup>a,b</sup>, Guozhen Ma<sup>a,b</sup>, Lijie Xie<sup>a,b</sup>, Dan Liu<sup>a,b</sup>, Yanling Wang<sup>a,b</sup>, Xinyu Zhao<sup>a,b</sup>, Yingying Su<sup>a,b</sup>, Andrei V. Perepelov<sup>c</sup>, Peng Ding<sup>a,b</sup>, Xiao Zhang<sup>a,b</sup>, Bo Xu<sup>a,b</sup>, Bin Liu<sup>a,b\*</sup>, Di Huang<sup>a,b\*</sup>

<sup>a</sup> Key Laboratory of Molecular Microbiology and Technology, Ministry of Education, Nankai University, Tianjin, China

<sup>b</sup> TEDA Institute of Biological Sciences and Biotechnology, Tianjin Key Laboratory of Microbial Functional Genomics, Nankai University, Tianjin, China.

<sup>c</sup> N. D. Zelinsky Institute of Organic Chemistry, Russian Academy of Sciences, 119991 Moscow, Russian Federation

#### Correspondence author:

\*Address for Correspondence: TEDA Institute of Biological Sciences and Biotechnology, Nankai University, 23 Hongda Street, Tianjin Economic-Technological Development Area (TEDA), Tianjin, 300457, P R China. Tel: 86-22-6622 9592. Fax: 86-22-6622 9596. E-mail: [liubin1981@nankai.edu.cn](mailto:liubin1981@nankai.edu.cn) or [huangdi@nankai.edu.cn](mailto:huangdi@nankai.edu.cn)

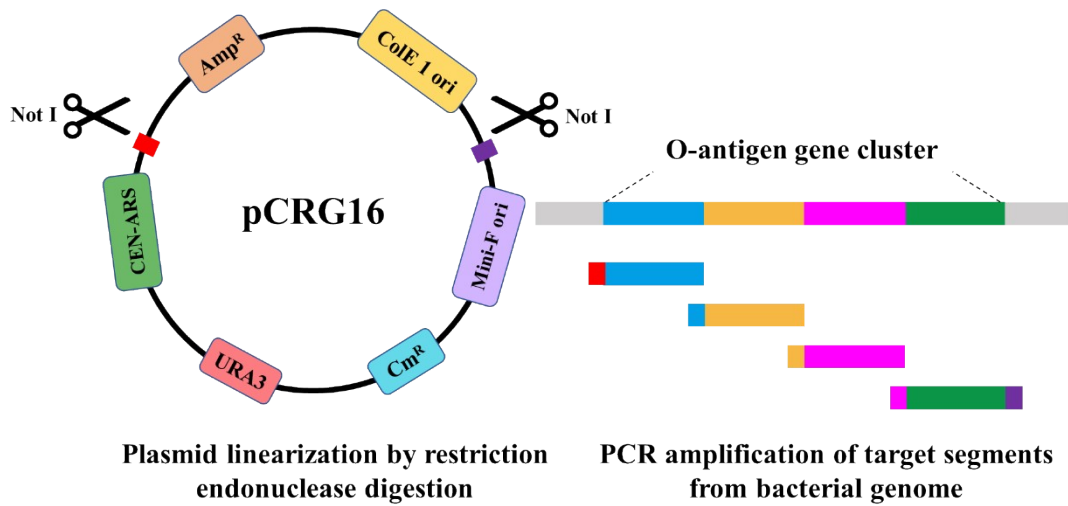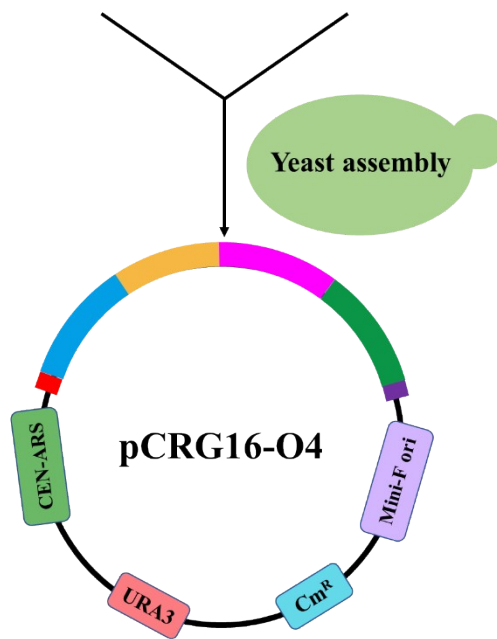

Construction of O-antigen expression plasmid

Fig. S1 Workflow for the construction of *E. coli* O4 OPS expression plasmid.

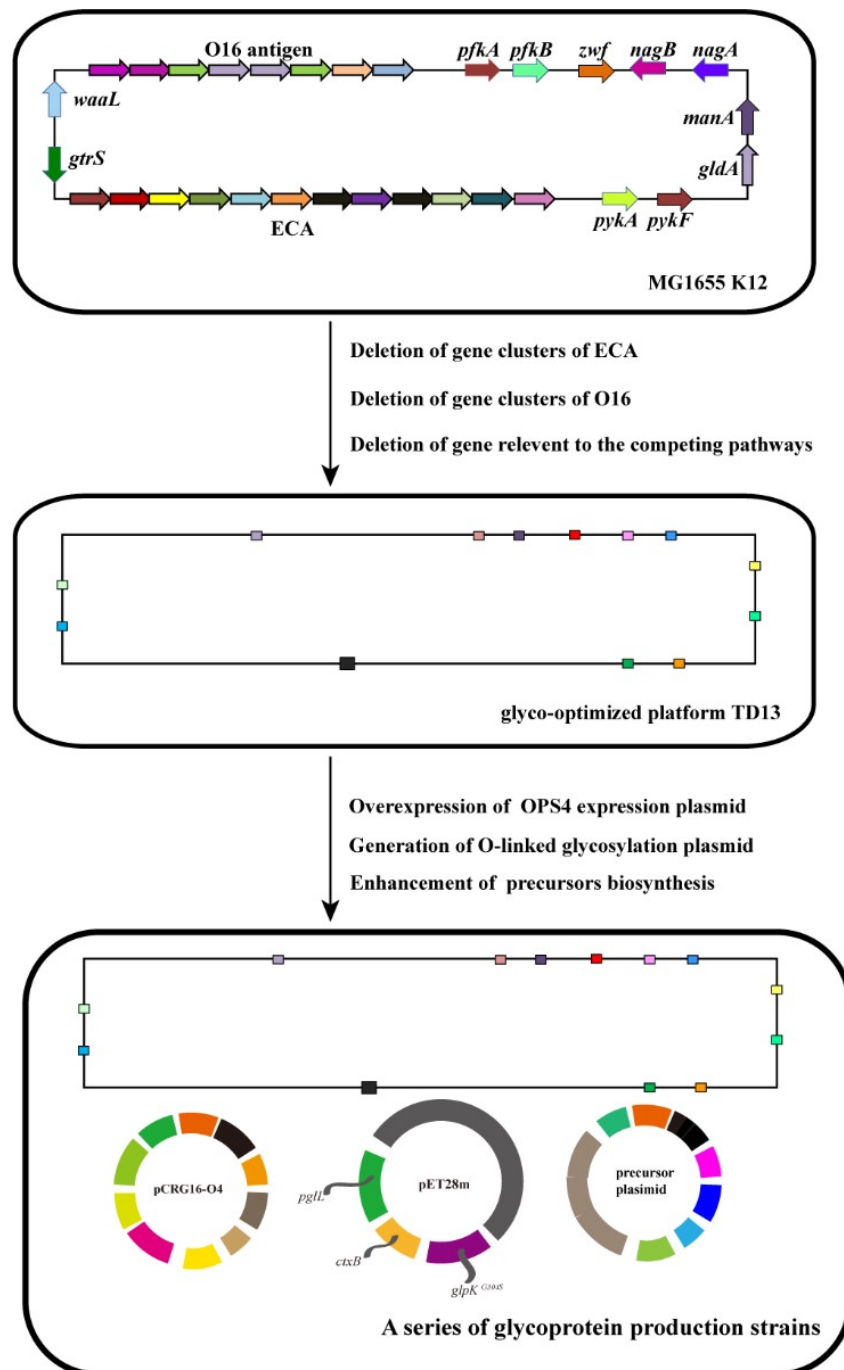

**Fig. S2** The procedure for constructing glyco-optimized platform TD13 to synthesize OPS4-specific glycoprotein. Gene clusters for the biosynthesis of O16 O-antigen, ECA, in *E. coli* MG1655 were deleted in the genome. Furthermore, some genes relevant to the competing pathways and *waaL* were deleted to construct the glyco-optimized platform TD13. Gene clusters for the biosynthesis of *E. coli* O4 O-antigen, genes responsible for O-linked glycosylation and the genes relevant to the precursor biosynthesis pathways were overexpressed to generate a series of glycoprotein production strains.

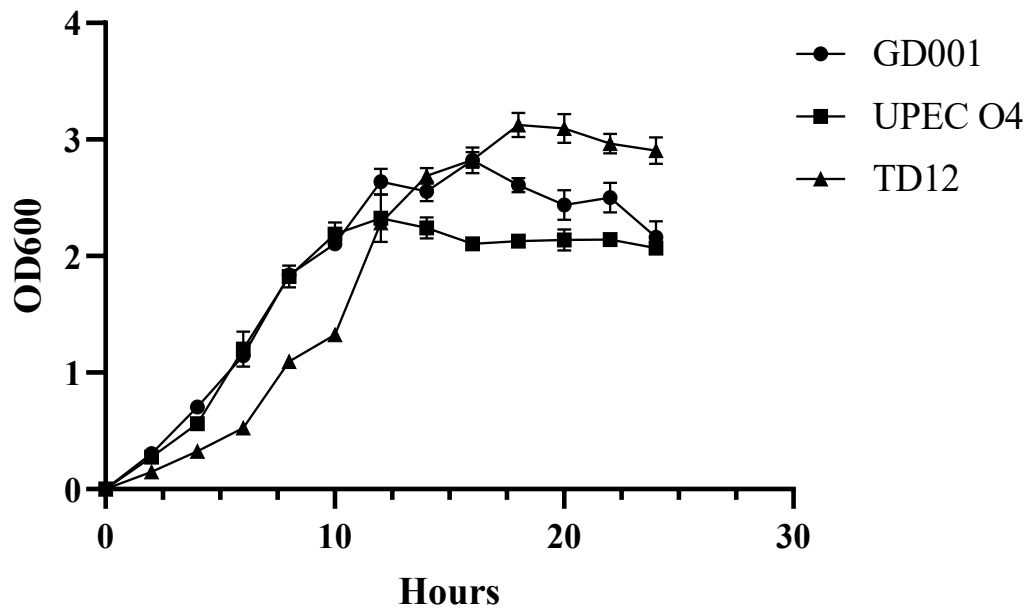

**Fig. S3 The growth profiles of LPS-producing strains.** Abbreviation: GD001 represents *E. coli* K-12 MG1655 harboring the OPS4 expression plasmid pCRG16-O4; TD12 represents *E. coli* K-12MG1655 $\Delta$ O16::FRT $\Delta$ ECA\*::FRT $\Delta$ zwf  $\Delta$ pfkA  $\Delta$ pfkB  $\Delta$ nagB  $\Delta$ pykA  $\Delta$ gldA  $\Delta$ pykF  $\Delta$ manA  $\Delta$ nagA  $\Delta$ gtrS harboring the OPS4 expression plasmid pCRG16-O4; UPEC O4 represents uropathogenic *E. coli* O4 serotype, as a positive control in this study.

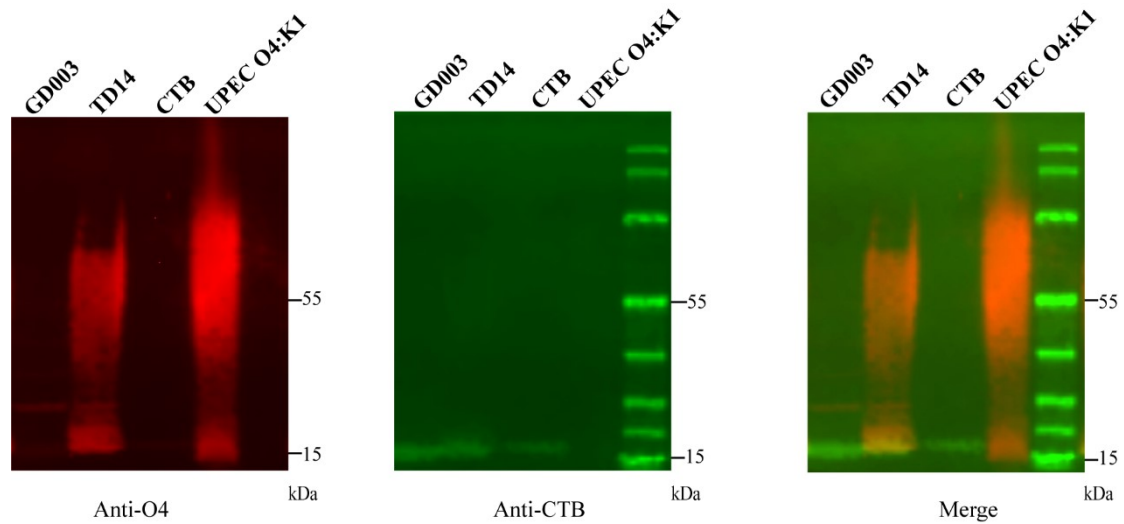

**Fig. S4 Western blot analysis of recombinant glycoproteins purified from the production strain TD14 and control strain GD003.** Anti-O4 channel probing with O4 OPS; Anti-CTB channel probing with CTB to verify the carrier protein; Merged images channel indicates anti-O4 and anti-CTB signals merged; Each lane was loaded with  $\sim 0.5 \mu\text{g}$  of glycoprotein based on total protein. Abbreviation: GD003 represents *E. coli* K-12 MG1655 $\Delta waaL$  harboring the OPS4 expression plasmid pCRG16-O4 and O-linked glycosylation plasmid pet28M-*pglL-CTB-glpK*<sup>G304S</sup>; TD14 represents *E. coli* K-12MG1655 $\Delta O16::FRT\Delta ECA^*::FRT\Delta zwf \Delta pfkA \Delta pfkB \Delta nagB \Delta pykA \Delta gldA \Delta pykF \Delta manA \Delta nagA \Delta ptrS \Delta waaL$  harboring the OPS4 expression plasmid pCRG16-O4 and O-linked glycosylation plasmid pet28M-*pglL-CTB-glpK*<sup>G304S</sup>; UPEC O4:K1 represents uropathogenic *E. coli* O4 serotype, as a control in this study.

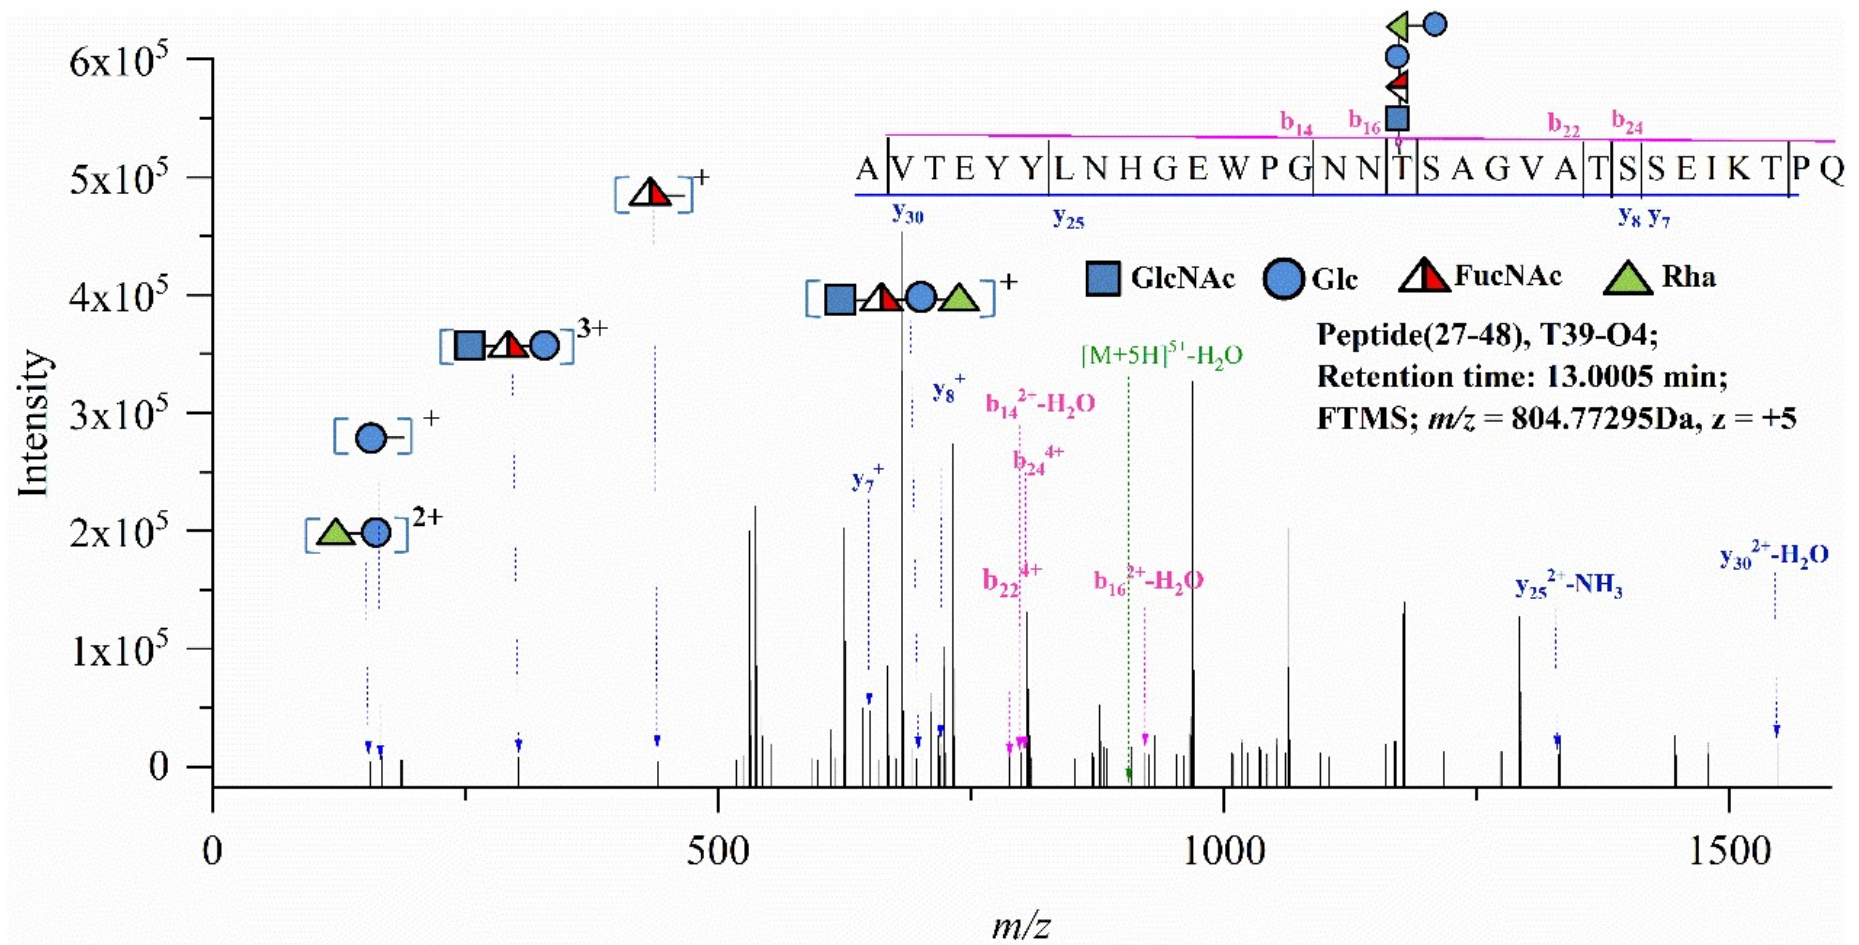

**Fig. S5** Nano-LC-MS/MS analysis of purified glycoprotein generated by TD14 carrying O-linked glycosylation plasmid pET28m- *pgll-CTB-glpK*<sup>G304S</sup> and the OPS4 expression plasmid.

**Table S1 Strains used in this study.**

| Strains                       | Relevant characteristics                                                                                                                                                                         | Source     |
|-------------------------------|--------------------------------------------------------------------------------------------------------------------------------------------------------------------------------------------------|------------|
| DH5 $\alpha$                  | F <sup>-</sup> <i>glnV44deoRnupGpurB20</i> $\Phi$ 80 <i>dlacZ</i> $\Delta$ M15 <i>Δ(lacZYA-argF)</i> U169 <i>recA1endA1hsdR17(rk<sup>-</sup>, mk<sup>+</sup>) thi-1 gyrA96 relA1</i> $\lambda$ - | Lab stock  |
| <i>E. coli</i> K-12<br>MG1655 | Wild type <i>E. coli</i> K-12; F <sup>-</sup> $\lambda$ - <i>ilvG- rfb-50 rph-1</i>                                                                                                              | Lab stock  |
| NEB-10 $\beta$                | <i>araD139 Δ(ara-leu)7697fhuA lacX74 galK16 (f80dΔ(lacZ)M15) galE15recA1 endA1 relA1nupG rpsL(Str<sup>R</sup>) Δ(mrr-hsdRMS mcrBC) rphspoT1</i>                                                  | NEB        |
| <i>E. coli</i> O4:K1          | Clinical isolate G1625                                                                                                                                                                           | Lab stock  |
| GD001                         | <i>E. coli</i> K-12 MG1655 harboring pCRG16-O4                                                                                                                                                   | Lab stock  |
| GD002                         | <i>E. coli</i> K-12 MG1655 <i>ΔwaaL</i>                                                                                                                                                          | Lab stock  |
| GD003                         | GD002 harboring pCRG16-O4 and pet28M- <i>NmpglL-ctxB-glpK</i> <sup>G304S</sup>                                                                                                                   | Lab stock  |
| TD11                          | <i>E. coli</i> K-12 MG1655 <i>ΔO16::FRT ΔECA*::FRT Δzwf ΔpfkA ΔpfbB ΔnagB ΔpykA ΔgldA ΔpykF ΔmanA ΔnagA ΔgtrS</i>                                                                                | Lab stock  |
| TD12                          | TD11 harboring pCRG16-O4                                                                                                                                                                         | This study |
| TD13                          | TD11 <i>ΔwaaL</i>                                                                                                                                                                                | This study |
| TD14                          | TD13 harboring pCRG16-O4 and pet28M- <i>NmpglL-ctxB-glpK</i> <sup>G304S</sup>                                                                                                                    | This study |
| TD15                          | TD14 harboring pCDFDuet- <i>EcRmlABCD</i>                                                                                                                                                        | This study |

|       |                                                             |            |
|-------|-------------------------------------------------------------|------------|
| TD16  | TD14 harboring pCDFDuet-RmlABCD                             | This study |
| TD17  | TD14 harboring pCDFDuet-FnlABC                              | This study |
| TD18  | TD14 harboring pCDFDuet-WbjBCD                              | This study |
| AGO01 | TD14 carrying plasmid pCDFDuet-P23108-RmlABCD-P23108-FnlABC | This work  |
| AGO02 | TD14 carrying plasmid pCDFDuet-P23113-RmlABCD-P23108-FnlABC | This work  |
| AGO03 | TD14 carrying plasmid pCDFDuet-P23108-RmlABCD-P23113-FnlABC | This work  |
| AGO04 | TD14 carrying plasmid pCDFDuet-P23108-RmlABCD-P23119-FnlABC | This work  |
| AGO05 | TD14 carrying plasmid pCDFDuet-P23113-RmlABCD-P23113-FnlABC | This work  |
| AGO06 | TD14 carrying plasmid pCDFDuet-P23113-RmlABCD-P23119-FnlABC | This work  |
| AGO07 | TD14 carrying plasmid pCDFDuet-P23119-RmlABCD-P23119-FnlABC | This work  |
| AGO08 | TD14 carrying plasmid pCDFDuet-P23119-RmlABCD-P23108-FnlABC | This work  |
| AGO09 | TD14 carrying plasmid pCDFDuet-P23119-RmlABCD-P23113-FnlABC | This work  |
| AGO10 | TD14 carrying plasmid pCDFDuet-P23119-RmlABCD-P23108-WbjBCD | This work  |
| AGO11 | TD14 carrying plasmid pCDFDuet-P23119-RmlABCD-P23113-WbjBCD | This work  |
| AGO12 | TD14 carrying plasmid pCDFDuet-P23119-RmlABCD-P23119-WbjBCD | This work  |
| AGO13 | TD14 carrying plasmid pCDFDuet-P23113-RmlABCD-P23108-WbjBCD | This work  |



|                      |                                                                                                                                               |                        |
|----------------------|-----------------------------------------------------------------------------------------------------------------------------------------------|------------------------|
| AGO14                | TD14 carrying plasmid pCDFDuet-P23113-RmlABCD-P23113-WbjBCD                                                                                   | This work              |
| AGO15                | TD14 carrying plasmid pCDFDuet-P23113-RmlABCD-P23119-WbjBCD                                                                                   | This work              |
| AGO16                | TD14 carrying plasmid pCDFDuet-P23108-RmlABCD-P23113-WbjBCD                                                                                   | This work              |
| AGO17                | TD14 carrying plasmid pCDFDuet-P23108-RmlABCD-P23108-WbjBCD                                                                                   | This work              |
| AGO18                | TD14 carrying plasmid pCDFDuet-P23108-RmlABCD-P23119-WbjBCD                                                                                   | This work              |
| <i>S. cerevisiae</i> | <i>S. cerevisiae</i> recombinational cloning strain; <i>MAT<math>\alpha</math></i> , <i>ura3<math>\Delta</math></i> , <i>cyh2<sup>R</sup></i> | Reference <sup>1</sup> |

---

**Table S2 Plasmids used in this study.**

| Plasmids                                                        | Relevant characteristics                                                                                                                                                                                                                        | Source         |
|-----------------------------------------------------------------|-------------------------------------------------------------------------------------------------------------------------------------------------------------------------------------------------------------------------------------------------|----------------|
| pET28m                                                          | pet28a (+)-derived plasmid, the original T <sub>7</sub> region between <i>Bgl</i> III and <i>Xho</i> I site was replaced by a 1236-nucleotide fragment containing double <i>tac</i> promoter, <i>rrnB</i> _T1/T2 terminator. Kan <sup>R</sup>   | Lab stock      |
| pCDFm                                                           | pCDFDuet (+)-derived plasmid, the original T <sub>7</sub> region between <i>Bgl</i> III and <i>Xho</i> I site was replaced by a 1236-nucleotide fragment containing double <i>tac</i> promoter, <i>rrnB</i> _T1/T2 terminator. Str <sup>R</sup> | This study     |
| pCRG16                                                          | Yeast- <i>E. coli</i> shuttle vector for recombinational cloning of large DNA fragments. <i>E. coli</i> mini-F and ColE1 replicons, yeast CEN-ARS replicon. Cm <sup>R</sup> , Amp <sup>R</sup> ( <i>E. coli</i> ); URA3, CYH2 (yeast)           | Lab stock      |
| pCRG16-O4                                                       | pCRG16 harboring the O4 gene cluster containing <i>wcaM</i> to <i>hisI</i>                                                                                                                                                                      | This study     |
| pET28m- <i>pglL</i> - <i>CTB</i>                                | Derivative of pet28M containing the <i>pglL</i> and <i>CTB</i>                                                                                                                                                                                  | Lab stock      |
| pET28m- <i>pglL</i> - <i>CTB</i> - <i>glpK</i> <sup>G304S</sup> | Derivative of pet28M containing the <i>pglL</i> and <i>CTB</i> and <i>glpK</i> <sup>G305S</sup> genes. Kan <sup>R</sup>                                                                                                                         | This study     |
| pD                                                              | Derivative of pCDFm containing the <i>pgm</i> , <i>galUE</i> , <i>glmS</i> and <i>glmU</i> genes. Str <sup>R</sup>                                                                                                                              | This study     |
| pCas                                                            | <i>repA101</i> (Ts) <i>pSCI01 Pcas-cas9 P<sub>araBAD</sub>-exo, beta</i> and <i>gamalacI<sup>q</sup>P<sub>trc</sub>-sgRNA-pMB1</i> . Kan <sup>R</sup>                                                                                           | This study     |
| pRock                                                           | p15A PlacIQ-sgRNA-ApmR J23119-sgRNA-BsaI. Tet <sup>R</sup>                                                                                                                                                                                      | Reference<br>2 |
| pPaper                                                          | p15A PlacIQ-sgRNA-TetR J23119-sgRNA-BsaI. Cm <sup>R</sup>                                                                                                                                                                                       | Reference<br>2 |

| Plasmids                          | Relevant characteristics                                                                                                                                                                                                             | Source     |
|-----------------------------------|--------------------------------------------------------------------------------------------------------------------------------------------------------------------------------------------------------------------------------------|------------|
| pTarget                           | <i>pMB1aadA</i> . Str <sup>R</sup> or Spec <sup>R</sup>                                                                                                                                                                              | This study |
| pCDF-RmlABCD                      | Derivative of pCDFm which carries the genes <i>RmlA</i> , <i>RmlB</i> , <i>RmlC</i> and <i>RmlD</i> . Str <sup>R</sup>                                                                                                               | This study |
| pCDF-EcRmlABCD                    | Derivative of pCDFm which carries the genes <i>EcRmlA</i> , <i>EcRmlB</i> , <i>EcRmlC</i> and <i>EcRmlD</i> . Str <sup>R</sup>                                                                                                       | This study |
| pCDF-FnlABC                       | Derivative of pCDFm which carries the genes <i>FnlA</i> , <i>FnlB</i> and <i>FnlC</i> . Str <sup>R</sup>                                                                                                                             | This study |
| pCDF-WbjBCD                       | Derivative of pCDFm which carries the genes <i>WbjB</i> , <i>WbjC</i> and <i>WbjD</i> . Str <sup>R</sup>                                                                                                                             | This study |
| pCDF-P23108-RmlABCD-P23108-FnlABC | pCDFDuet-1 plasmid carrying the genes <i>RmlA</i> , <i>RmlB</i> , <i>RmlC</i> and <i>RmlD</i> with J23108 promoter in MCS-1, and the genes <i>FnlA</i> , <i>FnlB</i> and <i>FnlC</i> with J23108 promoter in MCS-2. Str <sup>R</sup> | This study |
| pCDF-P23113-RmlABCD-P23108-FnlABC | pCDFDuet-1 plasmid carrying the genes <i>RmlA</i> , <i>RmlB</i> , <i>RmlC</i> and <i>RmlD</i> with J23113 promoter in MCS-1, and the genes <i>FnlA</i> , <i>FnlB</i> and <i>FnlC</i> with J23108 promoter in MCS-2. Str <sup>R</sup> | This study |
| pCDF-P23108-RmlABCD-P23113-FnlABC | pCDFDuet-1 plasmid carrying the genes <i>RmlA</i> , <i>RmlB</i> , <i>RmlC</i> and <i>RmlD</i> with J23108 promoter in MCS-1, and the genes <i>FnlA</i> , <i>FnlB</i> and <i>FnlC</i> with J23113 promoter in MCS-2. Str <sup>R</sup> | This study |
| pCDF-P23108-RmlABCD-P23119-FnlABC | pCDFDuet-1 plasmid carrying the genes <i>RmlA</i> , <i>RmlB</i> , <i>RmlC</i> and <i>RmlD</i> with J23108 promoter in MCS-1, and the genes <i>FnlA</i> , <i>FnlB</i> and <i>FnlC</i> with J23119 promoter in MCS-2. Str <sup>R</sup> | This study |
| pCDF-P23113-RmlABCD-P23113-FnlABC | pCDFDuet-1 plasmid carrying the genes <i>RmlA</i> , <i>RmlB</i> , <i>RmlC</i> and <i>RmlD</i> with J23113 promoter in MCS-1, and the genes <i>FnlA</i> , <i>FnlB</i> and <i>FnlC</i> with J23113 promoter in MCS-2. Str <sup>R</sup> | This study |
| pCDF-P23113-RmlABCD-P23119-FnlABC | pCDFDuet-1 plasmid carrying the genes <i>RmlA</i> , <i>RmlB</i> , <i>RmlC</i> and <i>RmlD</i> with J23113 promoter in MCS-1, and the genes <i>FnlA</i> , <i>FnlB</i> and <i>FnlC</i> with J23119 promoter in MCS-2. Str <sup>R</sup> | This study |

| Plasmids                          | Relevant characteristics                                                                                                                                                                                                             | Source     |
|-----------------------------------|--------------------------------------------------------------------------------------------------------------------------------------------------------------------------------------------------------------------------------------|------------|
| pCDF-P23119-RmlABCD-P23119-FnlABC | pCDFDuet-1 plasmid carrying the genes <i>RmlA</i> , <i>RmlB</i> , <i>RmlC</i> and <i>RmlD</i> with J23119 promoter in MCS-1, and the genes <i>FnlA</i> , <i>FnlB</i> and <i>FnlC</i> with J23119 promoter in MCS-2. Str <sup>R</sup> | This study |
| pCDF-P23119-RmlABCD-P23108-FnlABC | pCDFDuet-1 plasmid carrying the genes <i>RmlA</i> , <i>RmlB</i> , <i>RmlC</i> and <i>RmlD</i> with J23119 promoter in MCS-1, and the genes <i>FnlA</i> , <i>FnlB</i> and <i>FnlC</i> with J23108 promoter in MCS-2. Str <sup>R</sup> | This study |
| pCDF-P23119-RmlABCD-P23113-FnlABC | pCDFDuet-1 plasmid carrying the genes <i>RmlA</i> , <i>RmlB</i> , <i>RmlC</i> and <i>RmlD</i> with J23119 promoter in MCS-1, and the genes <i>FnlA</i> , <i>FnlB</i> and <i>FnlC</i> with J23113 promoter in MCS-2. Str <sup>R</sup> | This study |
| pCDF-P23119-RmlABCD-P23108-WbjBCD | pCDFDuet-1 plasmid carrying the genes <i>RmlA</i> , <i>RmlB</i> , <i>RmlC</i> and <i>RmlD</i> with J23119 promoter in MCS-1, and the genes <i>WbjB</i> , <i>WbjC</i> and <i>WbjD</i> with J23108 promoter in MCS-2. Str <sup>R</sup> | This study |
| pCDF-P23119-RmlABCD-P23113-WbjBCD | pCDFDuet-1 plasmid carrying the genes <i>RmlA</i> , <i>RmlB</i> , <i>RmlC</i> and <i>RmlD</i> with J23119 promoter in MCS-1, and the genes <i>WbjB</i> , <i>WbjC</i> and <i>WbjD</i> with J23113 promoter in MCS-2. Str <sup>R</sup> | This study |
| pCDF-P23119-RmlABCD-P23119-WbjBCD | pCDFDuet-1 plasmid carrying the genes <i>RmlA</i> , <i>RmlB</i> , <i>RmlC</i> and <i>RmlD</i> with J23119 promoter in MCS-1, and the genes <i>WbjB</i> , <i>WbjC</i> and <i>WbjD</i> with J23119 promoter in MCS-2. Str <sup>R</sup> | This study |
| pCDF-P23113-RmlABCD-P23108-WbjBCD | pCDFDuet-1 plasmid carrying the genes <i>RmlA</i> , <i>RmlB</i> , <i>RmlC</i> and <i>RmlD</i> with J23113 promoter in MCS-1, and the genes <i>WbjB</i> , <i>WbjC</i> and <i>WbjD</i> with J23108 promoter in MCS-2. Str <sup>R</sup> | This study |
| pCDF-P23113-RmlABCD-P23113-WbjBCD | pCDFDuet-1 plasmid carrying the genes <i>RmlA</i> , <i>RmlB</i> , <i>RmlC</i> and <i>RmlD</i> with J23113 promoter in MCS-1, and the genes <i>WbjB</i> , <i>WbjC</i> and <i>WbjD</i> with J23113 promoter in MCS-2. Str <sup>R</sup> | This study |
| pCDF-P23113-RmlABCD-P23119-WbjBCD | pCDFDuet-1 plasmid carrying the genes <i>RmlA</i> , <i>RmlB</i> , <i>RmlC</i> and <i>RmlD</i> with J23113 promoter in MCS-1, and the genes <i>WbjB</i> , <i>WbjC</i> and <i>WbjD</i> with J23119 promoter in MCS-2. Str <sup>R</sup> | This study |

| Plasmids                          | Relevant characteristics                                                                                                                                                                                                             | Source     |
|-----------------------------------|--------------------------------------------------------------------------------------------------------------------------------------------------------------------------------------------------------------------------------------|------------|
| pCDF-P23108-RmlABCD-P23113-WbjBCD | pCDFDuet-1 plasmid carrying the genes <i>RmlA</i> , <i>RmlB</i> , <i>RmlC</i> and <i>RmlD</i> with J23108 promoter in MCS-1, and the genes <i>WbjB</i> , <i>WbjC</i> and <i>WbjD</i> with J23113 promoter in MCS-2. Str <sup>R</sup> | This study |
| pCDF-P23108-RmlABCD-P23108-WbjBCD | pCDFDuet-1 plasmid carrying the genes <i>RmlA</i> , <i>RmlB</i> , <i>RmlC</i> and <i>RmlD</i> with J23108 promoter in MCS-1, and the genes <i>WbjB</i> , <i>WbjC</i> and <i>WbjD</i> with J23108 promoter in MCS-2. Str <sup>R</sup> | This study |
| pCDF-P23108-RmlABCD-P23119-WbjBCD | pCDFDuet-1 plasmid carrying the genes <i>RmlA</i> , <i>RmlB</i> , <i>RmlC</i> and <i>RmlD</i> with J23108 promoter in MCS-1, and the genes <i>WbjB</i> , <i>WbjC</i> and <i>WbjD</i> with J23119 promoter in MCS-2. Str <sup>R</sup> | This study |
| pCDFm-pgm-galUE                   | Derivative of pCDFm which carries the genes <i>pgm</i> and <i>galUE</i> . Str <sup>R</sup>                                                                                                                                           | This study |
| pCDFm-pgm-galUE-glmS-glmU         | Derivative of pCDFm which carries the genes <i>pgm</i> , <i>galUE</i> , <i>glmS</i> and <i>glmU</i> . Str <sup>R</sup>                                                                                                               | This study |
| pCP20                             | <i>repA101</i> (Ts) <i>pSC101</i> $\lambda$ repressor (ts) FLP. Amp <sup>R</sup> and Cm <sup>R</sup>                                                                                                                                 | This study |

**Table S3 Oligonucleotides used in this study.**

| <b>Primer</b>              | <b>Sequence</b>                                                                                                                     |
|----------------------------|-------------------------------------------------------------------------------------------------------------------------------------|
| O4-1-F                     | ACTTCGTATAGCATACATTATACGAAGTTATATTCGATG<br>CGCAACATCTTTTTATGCGAAATATC                                                               |
| O4-1-R                     | GATTTCTCTGATTACAGCTCGACTA                                                                                                           |
| O4-2-F                     | TCATACAAAACCTGCAAGCCAATTAT                                                                                                          |
| O4-2-R                     | CATCTAACCTATCAGTATTATGAGA                                                                                                           |
| O4-3-F                     | GTTGGCTATTGCACTCAAAGAATTA                                                                                                           |
| O4-3-R                     | TCATCGGCAATTTGCTTGAAGTAAG                                                                                                           |
| O4-4-F                     | AAAGCTGAGTTTATCGAGAAAGTTC                                                                                                           |
| O4-4-R                     | TGCCCGTTTTCTTTAAAACCGAAAA                                                                                                           |
| O4-grS-F                   | gctgctgggcggtatggtgggtgcggggattgtgctggggcgtaacgctctgcgtaattac<br>aacgtgaagtaatcttttcggttttaagaaaacgggcaGAGCTTGGATGATTA<br>TTGACACAC |
| O4-grS-R                   | AATTATAATTATTTTTATAGCACGTGATGAAAAGGACC<br>GCGTGTGTCAATAATCATCCAAGCTC                                                                |
| O4-verify-F1               | TCTCTTGCAAATGTTTCATGCGATGA                                                                                                          |
| O4-verify-R1               | TCTGGTTAAAACCTCTCAAAAAAGAA                                                                                                          |
| O4-verify-F2               | ACACACATTGCTATGGAATGATCCA                                                                                                           |
| O4-verify-R2               | CGATAATAATCACCCATATCCTCCG                                                                                                           |
| O4-verify-F3               | GGCAATAATGGTGATATTTTTGTCC                                                                                                           |
| O4-verify-R3               | TCATTTTCTTCTCGATATCGAAAGT                                                                                                           |
| O4-verify-F4               | AGTACAACCTGGGATCTGAACTACGG                                                                                                          |
| O4-verify-R4               | GCTCTTCTGATTATCCAGCGTTTC                                                                                                            |
| O4-verify-F5               | ATGCCCGTTTTTTTTGCCGGATGCGATGC                                                                                                       |
| O4-verify-R5               | ATGTTAACAGAACAACAACGTCGCG                                                                                                           |
| Gene-deletion construction |                                                                                                                                     |
| Ptarget F                  | ACTAGTATTATACCTAGGACTGAGC                                                                                                           |
| Ptarget R                  | CCTGTTATCCCTACTCGAG                                                                                                                 |
| gRNAR                      | GTAATAGATCTAAGCTTCTGC                                                                                                               |
| manA-up-F                  | gaagcttagatctattacATCGCGGTGCCGGTATCCTGACAGG                                                                                         |

|                          |                                                                  |
|--------------------------|------------------------------------------------------------------|
| manA-up-R                | GATCAATCCCTGTTTTAATGTGGAA                                        |
| manA-down-F              | TTCCACATTAACAGGGATTGATCCATCTCTTGCTAAG<br>CTTATT                  |
| manA-down-R              | tcgagtagggataacaggACTGGAATCACCGCTGTAACCAATG                      |
| manA-gRNA                | cctaggtataataactagtCTATGCCTGGGGCAGCAAAAgttttagagctag<br>aatagca  |
| wecB-up-F                | gaagcttagatctattacTCAATGACAGCGTGAAGCTTATTGC                      |
| wecB-up-R                | CGATTCTCTTCGAATAAGCGGCGAG                                        |
| wecB-down-F              | CTCGCCGCTTATTCGAAGAGAATCGGCGACCATTTCTGT<br>TATCGG                |
| wecB-down-R              | tcgagtagggataacaggTGCTGCGGGAAAGTGAGATCCGGAC                      |
| wecB-gRNA                | cctaggtataataactagtCAACATAATGCAGCCAGGACgttttagagctag<br>aatagca  |
| waaL-up-F                | gaagcttagatctattacGTAGAACGCACCCGCGAACTGTTTG                      |
| waaL-up-R                | TCCAAAAGCTTGCTTGACTGTTGAGGT                                      |
| waaL-down -F             | ACCTCAACAGTCAAGCAGTTTTGGAAGTTTAAGAAGTG<br>AGTTAAAAGTCA           |
| waaL-down -R             | tcgagtagggataacaggGAATTTATTGGAGATACAAGAATAG                      |
| waaL-gRNA                | cctaggtataataactagtTAGGCTTGCTTGATTAAATTgttttagagctaga<br>aatagca |
| glpK <sup>G3054</sup> -F | GTATACATGACTGAAAAAAAAATATATCGTTG                                 |
| glpK <sup>G3054</sup> -R | GATGGCGTGGGAAGAACACGACGAA                                        |
| pCDF-EcRmlABCD-F1        | CCTGCATTGTGAAAATACTTGTTACTGGTGGCG                                |
| pCDF-EcRmlABCD-R1        | GGATCCTTACTGGCGGCCCTCATAGTTCTCT                                  |
| pCDF-EcRmlABCD-F2        | GGATCCAAGGAGATATACATGAATATCCTCCTTTTTGG<br>C                      |
| pCDFm-EcRmlABCD-R2       | GAGCTCTTAAATTGCCGTAGTCGTAAATA                                    |
| pCDFm-EcRmlABCD-F3       | GAGCTCAAGGAGATATACATGAAAACGCGTAAAG                               |
| pCDFm-EcRmlABCD-R3       | CTGCAGTTAATAACCTTTAATCATTTTTAGC                                  |
| pCDFm-EcRmlABCD-F4       | CTGCAGATGAACGTAATTAATAACTGAAATTC                                 |
| pCDFm-EcRmlABCD-R4       | AAGCTT TTATATTGTAGTTGGATCATTCCAT                                 |
| pCDFm-EcRmlABCD-VF1      | TTGACAGCTAGCTCAGTCCTAGGTA                                        |

|                     |                                  |
|---------------------|----------------------------------|
| -EcRmlABCD-VR1      | GGCGCTAAAGCGCGTTGCAGTTCGT        |
| pCDFm-EcRmlABCD-VF2 | TGAACGCGGGCGCGTATACCGCGGT        |
| -EcRmlABCD-VR2      | CTGCCAGGCATCAAATAAAACGAGC        |
| pCDFm-RmlABCD-F1    | ATGAAACGCAAGGGCATCATCCTCG        |
| pCDFm-RmlABCD-R1    | TCAGTACACGGTCTCGGTCAGCAGG        |
| pCDFm-RmlABCD-F2    | ATTCGCGAAATTCTGATTATTAGCA        |
| pCDFm-RmlABCD-R2    | CCGGTATCCAGCCACGCATAGCCGC        |
| pCDFm-RmlABCD-F3    | ATGAAAGCGACCCGCCTGGCAATTCCCG     |
| pCDFm-RmlABCD-R3    | TCAGGGGAAGCAGTCGGCGTCGGCG        |
| pCDFm-RmlABCD-F4    | ATGAACCGGATCCTTCTCCTCGGCG        |
| pCDFm-RmlABCD-R4    | TCATAGTGGTCCCTGCTCGCTCA          |
| pCDFm-RmlABCD-VF1   | CTAGCTCAGTCCTAGGTATAATAAAG       |
| pCDFm-RmlABCD-VR1   | CGGTCAGCAGGCGTTTCAGATACTG        |
| pCDFm-RmlABCD-VF2   | AAAACCTATGCGGGCAACCGCAACG        |
| pCDFm-RmlABCD-VR2   | TTACGCATATTTGCCACC               |
| pCDFm-FnlABC-F1     | ATGTTTAATGGTAAAATATTGTAA         |
| pCDFm-FnlABC-R1     | TTATGAATCCAACCTCATAATCTTCA       |
| pCDFm-FnlABC-F2     | ATGAGTTGGATTCATAATATGAAAA        |
| pCDFm-FnlABC-R2     | TCACGATAAAACTCTCGCTATAGTA        |
| pCDFm-FnlABC-F3     | ATGTCGGTTGTTGGGACTCGTCCAG        |
| pCDFm-FnlABC-R3     | TTAGTATTGCTTCCAGACAACCCGTT       |
| pCDFm-FnlABC-VF1    | GAGATATACATGTTTAACGGCAAAA        |
| pCDFm-FnlABC-VR1    | GGCGCTTTCTGCACAAAAATATCGC        |
| pCDFm-FnlABC-VF2    | TACTGAAACTGCCGTTTATTCGCGC        |
| pCDFm-FnlABC-VR2    | GTATACGCAAACCTGTTCGGGGCTCA       |
| pCDFm-WbjBCD-F1     | CATATGATGGATAAGAACTCTGTTCTGTTAAT |
| pCDFm-WbjBCD-R1     | GATATCTTTTCTCTGGACTGGCACTCTCGA   |
| pCDFm-WbjBCD-F2     | GATATCATGAAAGTTCTTGTAACCTGGCGCGA |
| pCDFm-WbjBCD-R2     | GGTACC TTACGCACCTTCGCCTACTGAACAA |
| pCDFm-WbjBCD-F3     | GGTACCATGCAGAAGCTAAAAGTCGTTACGG  |
| pCDFm-WbjBCD-R3     | CTCGAGTTAATATTTTTTCCAGACAGTTCGC  |



|                  |                           |
|------------------|---------------------------|
| pCDFm-WbjBCD-VF1 | ATGAGCTGTTGACAATTAATCATC  |
| pCDFm-WbjBCD-VR1 | ATCTCCTTAGTAGGCTATTCTTCCG |
| pCDFm-WbjBCD-VF2 | TACCTATGCGTGCAGCGTGGGTGAA |
| pCDFm-WbjBCD-VR2 | GTGCGCATCACATAATCGCGATAGC |

---

**Lowercase letters represent homologous sequences to the genome, RBS sequences, restriction site sequences. Red letters represent N20 sequences of each gene.**

**Table S4 *E*-factors and process complexity determined for the production process of glycoprotein.**

| Manufacturing processes                        | <i>E</i> -factor <sup>a</sup> [kg kg <sup>-1</sup> ] | No. of steps |
|------------------------------------------------|------------------------------------------------------|--------------|
| Bioconjugation methodology                     | 1600~2000 <sup>b</sup>                               | 3-4          |
| Pharmaceuticals (antibiotics, drugs, vaccines) | 25->100 <sup>c</sup>                                 | 2+           |

<sup>a</sup> The *E*-factor (Environmental impact factor) was proposed for assessing the environmental impact of manufacturing processes<sup>4</sup>.

$$\frac{\sum m(\text{Input materials}) - m(\text{Product})}{m(\text{Product})}$$

<sup>b</sup> Materials (glucose, glycerol and other raw materials) usage in green manufacture were described. Furthermore, losses from the purification process are also taken into account.

<sup>c</sup> The *E* factor in the pharmaceutical industry was typically calculated as 25->100 kg per kg<sup>5</sup>.

The detailed calculation process of *E* factor is displayed as followed.

The American Chemical Society (ACS) Green Chemistry Institute Pharmaceutical Roundtable (GCIPR) group has an initial attempt to establish a systematic environmental assessment of therapeutic biologics<sup>6</sup>.

The *E* factor in the pharmaceutical industry was typically calculated as 25 to over 100 kg per kg. However, traditional chemical methods for the production of glycoproteins are usually complex. Multiple steps are required whereby the O-antigen must be purified from the pathogen of interest, detoxified and subject to chemical activation. In parallel, the protein must also be purified and chemically activated before protein and glycan can be conjugated. Following conjugation, further rounds of purification are necessary before glycoprotein can be administered. Therefore, it takes at least 4 steps rather than 2 steps as reported to synthesize such glycoproteins using chemical and/or chemoenzymatic synthetic techniques.

Analysis of the bioconjugation route, the *E* factor was estimated as 1600-2000 kg per kg. A primary cause of the high *E* factors within the bioconjugation methodology is the rather low glycoprotein titer and the correspondingly large amount of input materials. In fact, the strategies for the biosynthesis of the glycoproteins offer a

promising alternative to prepare the therapeutic glycoprotein as a vaccine against UPEC in the microbial cell factory. However, this therapeutic glycoprotein is still in its initial stage, while proof-of-concept reactions have been demonstrated, further stepwise improvements are required to enhance the glycosylation efficiency (or site occupancy) for industrial production. For *E* factor calculation, it takes the chemical yield into account and includes reagents, solvent losses, all process aids and, in principle, even fuel (although this is often difficult to quantify). However, the glucose and glycerol and many other chemicals in this medium are not completely metabolized during the fermentation process. After 48 h fermentation, the content of the residual glucose and glycerol in the culture was at least 10 g/L and 10 g/L. Hence, the *E* factor in the bioconjugation route ranged from 1600 to 2000.

Despite the high *E* factor, such recombinant *E. coli* can direct the biosynthesis of glycoprotein in a “living glyco-factory” without the use of purified enzymes and protective groups usually applied by traditional chemical technologies.

Furthermore, the production of glycoprotein in glycoengineering *E. coli* can reduce the risk of viral contamination, which is superior to current chemical coupling methods. Moreover, the simple, cost-efficient and rapid growth culturing of the *E. coli* glycoengineering strain expands this method to a wider application of laboratories than existing chemical/chemoenzymatic production technologies.

The 12 Principles of Green Chemistry were developed by Paul Anastas and John Warner as a way to “help reduce or eliminate the use or generation of hazardous substances in the design, manufacture and application of chemical products”<sup>7</sup>. A traffic light assessment of the oligonucleotide process against these principles is presented in Table S5, highlighting several areas for improvement.

**Table S5 Assessment of glycoprotein manufacturing process against 12 principles of green chemistry.**

| Principle                                                 | Assessment for bioconjugation method<br>(initial stage )                                                                                               | Assessment for chemical methods                                                                                                                        |
|-----------------------------------------------------------|--------------------------------------------------------------------------------------------------------------------------------------------------------|--------------------------------------------------------------------------------------------------------------------------------------------------------|
| <b>Prevention of Waste</b>                                | A rather low titer which inevitably generates many wastes (mainly wastewater and carbon mix)                                                           | The generated waste are slightly low.                                                                                                                  |
| <b>Atom Economy</b>                                       | Atom economy for the starting materials is slightly poor                                                                                               | Atom economy for the starting materials is high                                                                                                        |
| <b>Less Hazardous Chemical Syntheses</b>                  | No or less hazardous reagents and solvents are involved                                                                                                | Some hazardous reagents and solvents are involved                                                                                                      |
| <b>Designing Safer Chemicals</b>                          | Glycoprotein generally as therapeutic drugs                                                                                                            | Glycoprotein generally as therapeutic drugs                                                                                                            |
| <b>Safer Solvents and Auxiliaries</b>                     | Only the safety fermentation medium is used                                                                                                            | Some solvents are used in the detoxified step                                                                                                          |
| <b>Design for Energy Efficiency</b>                       | Medium Energy Efficiency                                                                                                                               | Medium Energy Efficiency                                                                                                                               |
| <b>Use of Renewable Feedstocks</b>                        | Most reagents and materials are renewable and green feedstocks                                                                                         | Some reagents and materials are nonrenewable feedstocks                                                                                                |
| <b>Reduce Derivatives</b>                                 | No Derivatives generation                                                                                                                              | Protecting groups are used                                                                                                                             |
| <b>Catalysis</b>                                          | Biocatalysis process in vivo using the OTase                                                                                                           | Chemical conjugation process used                                                                                                                      |
| <b>Design for Degradation</b>                             | Can be degraded in <i>vivo</i>                                                                                                                         | Can be degraded                                                                                                                                        |
| <b>Real-time Analysis for Pollution Prevention</b>        | Analysis methods need to be further developed to allow for real-time, in-process monitoring and control prior to the formation of hazardous substances | Analysis methods need to be further developed to allow for real-time, in-process monitoring and control prior to the formation of hazardous substances |
| <b>Inherently Safer Chemistry for Accident Prevention</b> | Inherently safer chemistry for accident prevention                                                                                                     | Purification and detoxification of polysaccharide from the pathogenic bacteria                                                                         |

## References

1. C. K. Raymond, E. H. Sims and M. V. Olson, *Genome Res.*, 2002, **12**, 190-197.
2. J. Wang, X. Sui, Y. Ding, Y. Fu, X. Feng, M. Liu, Y. Zhang, M. Xian and G. Zhao, *Nucleic Acids Res.*, 2021, **49**, e12.
3. K. A. Datsenko and B. L. Wanner, *Proc. Natl. Acad. Sci. U.S. A.*, 2000, **97**, 6640-6645.
4. R. A. Sheldon, *Green Chem.*, 2017, **19**, 18-43.
5. F. Roschangar, R. A. Sheldon and C. H. Senanayake, *Green Chem.*, 2015, **17**, 752-768.
6. S. V. Ho, in *Green Chemistry in the Pharmaceutical Industry*, ed. P.J. Dunn, A.S. Wells and M.T. Williams, Wiley-VCH Verlag GmbH & Co. KGaA, Weinheim, Germany, 1<sup>st</sup> edition, 2010, Chapter 15: Environmental Considerations in Biologics Manufacture, pp. 311-331.
7. P. T. Anastas and J. C. Warner, *Green Chemistry: Theory and Practice*, Oxford University Press, Oxford, 1998.
